# Supplementary material
Source: publisher figshare collection journal article supplement (https://sage.figshare.com/ndownloader/files/12728228)
Supplement: Supplementary file 1 [file 12728228]

**Supplementary Table 1.** Trajectory patterns by demographic and clinical factors

|                                      | Trajectory I<br>(n = 39) | Trajectory II<br>(n=41) | Trajectory III<br>(n = 4) | $\chi^2$ -value |
|--------------------------------------|--------------------------|-------------------------|---------------------------|-----------------|
|                                      | n (%)                    | n (%)                   | n (%)                     |                 |
| Marriage                             |                          |                         |                           |                 |
| Married                              | 34 (40.5%)               | 33 (39.3%)              | 1 (1.2%)                  | 9.11*           |
| Not married                          | 5 (6.0%)                 | 8 (9.5%)                | 3 (3.6%)                  |                 |
| Education                            |                          |                         |                           |                 |
| Primary or High school               | 15 (17.9%)               | 19 (22.6%)              | 2 (2.4%)                  | .03             |
| College education or more            | 24 (28.6%)               | 22 (26.2%)              | 2 (2.4%)                  |                 |
| Stage of breast cancer               |                          |                         |                           |                 |
| 0                                    | 4 (4.8%)                 | 7 (8.3%)                | 0                         | .47             |
| I                                    | 21 (25.0%)               | 17 (20.2%)              | 3 (3.6%)                  |                 |
| II                                   | 14 (16.7%)               | 17 (20.2%)              | 1 (1.2%)                  |                 |
| Recurrence                           |                          |                         |                           | 1.43            |
| Yes                                  | 3 (3.6%)                 | 1 (1.2%)                | 0                         |                 |
| No                                   | 36 (42.9%)               | 40 (47.6%)              | 4 (4.8%)                  |                 |
| Received chemotherapy                |                          |                         |                           | .07             |
| Yes                                  | 27 (32.1%)               | 29 (34.5%)              | 3 (3.6%)                  |                 |
| No                                   | 12 (14.3%)               | 12 (14.3%)              | 1 (1.2%)                  |                 |
| Received radiotherapy                |                          |                         |                           | .24             |
| Yes                                  | 21 (25.0%)               | 24 (28.6%)              | 2 (2.4%)                  |                 |
| No                                   | 18 (21.4%)               | 17 (20.2%)              | 2 (2.4%)                  |                 |
|                                      | (mean $\pm$ SD)          | (mean $\pm$ SD)         |                           | F value         |
| Age (year)                           | 49.54 $\pm$ 8.03         | 50.89 $\pm$ 9.11        | 41.05 $\pm$ 7.41          | 2.44            |
| Months after completion of treatment | 12.82 $\pm$ 5.82         | 11.22 $\pm$ 4.97        | 9.50 $\pm$ 0.58           | .32             |
| Months after diagnosis               | 19.77 $\pm$ 6.36         | 18.39 $\pm$ 8.94        | 18.50 $\pm$ 7.85          | 1.33            |

\*  $p < .05$

**Supplementary Table 2.** Estimates of single level binary logistic regression model for trajectories of posttraumatic growth with Time 1 coping and symptoms as predictors

|             | B     | S.E. | Wald  | df | Sig. | Exp(B)<br>(odd ratio) |
|-------------|-------|------|-------|----|------|-----------------------|
| Mini MAC HH | -.292 | .140 | 4.340 | 1  | .037 | .747                  |
| Mini MAC AP | .192  | .114 | 2.862 | 1  | .091 | 1.212                 |
| Mini MAC CA | -.205 | .162 | 1.610 | 1  | .204 | .815                  |
| Mini MAC FS | .077  | .198 | .153  | 1  | .696 | 1.081                 |
| Mini MAC FA | .377  | .186 | 4.128 | 1  | .042 | 1.458                 |
| HADS Dep    | .333  | .136 | 5.953 | 1  | .015 | 1.395                 |
| HADS Anx    | -.220 | .132 | 2.771 | 1  | .096 | .803                  |

**Note:** PTGI Total Score: Posttraumatic Growth Inventory Total Score; Mini MAC HH: Mini-Mental Adjustment to Cancer Scale Hopelessness-Helplessness; Mini MAC AP: Mini-Mental Adjustment to Cancer Scale Anxious Preoccupation; Mini MAC CA: Mini-Mental Adjustment to Cancer Scale Cognitive Avoidance; Mini MAC FS: Mini-Mental Adjustment to Cancer Scale Fighting Spirit; Mini MAC FA: Mini-Mental Adjustment to Cancer Scale Fatalism; HADS Dep: Hospital Anxiety and Depression Scale Depression; HADS Anx: Hospital Anxiety and Depression Anxiety

**Supplementary Table 3.** Fit indices for one to four class growth mixture models (conditional with Hopelessness-Helplessness and Depression set as covariates)

| Fit Indices      | Growth mixture mode |             |               |              |
|------------------|---------------------|-------------|---------------|--------------|
|                  | One class           | Two classes | Three classes | Four classes |
| AIC              | 1795.20             | 1725.27     | 1697.26       | 1693.99      |
| BIC              | 1816.06             | 1757.72     | 1741.29       | 1749.61      |
| SSBIC            | 1787.69             | 1713.59     | 1681.41       | 1673.96      |
| Entropy          | -                   | .99         | .86           | .88          |
| VLMR-LRT p value | -                   | < .001      | .048          | .30          |
| LMR-LRT p value  | -                   | < .001      | .056          | .32          |
| BLRT p value     | -                   | < .001      | < .001        | .11          |

**Note:** AIC: Akaike information criterion; BIC: Bayesian information criterion; SSBIC: sample size adjusted Bayesian information criterion; VLRT: Vuong-Lo-Mendell-Rubin likelihood ratio test; LMR LRT: Lo-Mendell-Rubin test; BLRT: bootstrap likelihood ratio test.
